# Supplementary material for: Unusual behaviour of phototrophic picoplankton in turbid waters
Source: PubMed Central journal article supplement (PMC5367718; doi:10.1371/journal.pone.0174316), 2017-03-27
Supplement: pone.0174316.s001.pdf [file pone.0174316.s001.pdf]

## Supplementary material on measured parameters (Somogyi et al.)

| Lake         | Coordinates                 | Date       | TSS-Org (mg/L) | Chlorophyll a (ug/l) | APP abundance (cells/ml) | APP biomass (µg/l) | APP contribution (%) |
|--------------|-----------------------------|------------|----------------|----------------------|--------------------------|--------------------|----------------------|
| Zab-szék pan | N46°50.190';<br>E19°10.283' | 17/04/2013 | 1493           | 6.80                 | 78597                    | 159                | 100                  |
| Zab-szék pan | N46°50.190';<br>E19°10.283' | 30/05/2013 | 786            | 11.73                | 102176                   | 207                | 100                  |
| Zab-szék pan | N46°50.190';<br>E19°10.283' | 18/06/2013 | 640            | 1.71                 | 89825                    | 160                | 100                  |
| Zab-szék pan | N46°50.190';<br>E19°10.283' | 24/07/2013 | 368            | 3.83                 | 110036                   | 176                | 100                  |
| Zab-szék pan | N46°50.190';<br>E19°10.283' | 15/08/2013 | 438            | 44.05                | 8829063                  | 5811               | 99                   |
| Zab-szék pan | N46°50.190';<br>E19°10.283' | 24/09/2013 | 2191           | 153.24               | 14068863                 | 18449              | 100                  |
| Zab-szék pan | N46°50.190';<br>E19°10.283' | 17/10/2013 | 1991           | 259.82               | 8160989                  | 14998              | 100                  |
| Zab-szék pan | N46°50.190';<br>E19°10.283' | 19/11/2013 | 1638           | 430.18               | 64449540                 | 127714             | 100                  |
| Zab-szék pan | N46°50.190';<br>E19°10.283' | 09/12/2013 | 897            | 455.74               | 57288480                 | 114633             | 100                  |
| Zab-szék pan | N46°50.190';<br>E19°10.283' | 06/04/2001 | 1123           | 86.30                | 4718000                  | 10253              | 97                   |
| Zab-szék pan | N46°50.190';<br>E19°10.283' | 26/05/2001 | 762            | 31.86                | 14868000                 | 18788              | 98                   |
| Zab-szék pan | N46°50.190';<br>E19°10.283' | 16/06/2001 | 517            | 110.00               | 28428000                 | 18742              | 99                   |
| Zab-szék pan | N46°50.190';<br>E19°10.283' | 19/07/2001 | 1055           | 59.94                | 5679450                  | 3895               | 98                   |
| Zab-szék pan | N46°50.190';<br>E19°10.283' | 14/08/2001 | 601            | 150.98               | 103079200                | 53601              | 98                   |
| Zab-szék pan | N46°50.190';<br>E19°10.283' | 16/10/2001 | 611            | 9.45                 | 768000                   | 1352               | 92                   |

## Supplementary material on measured parameters (Somogyi et al.)

| Lake             | Coordinates                 | Date       | TSS-Org (mg/L) | Chlorophyll a (ug/l) | APP abundance (cells/ml) | APP biomass (µg/l) | APP contribution (%) |
|------------------|-----------------------------|------------|----------------|----------------------|--------------------------|--------------------|----------------------|
| Kelemen-szék pan | N46°47.542';<br>E19°10.647' | 17/04/2013 | 2151           | 16.88                | 26199                    | 53                 | 100                  |
| Kelemen-szék pan | N46°47.542';<br>E19°10.647' | 30/05/2013 | 431            | 3.72                 | 74667                    | 151                | 100                  |
| Kelemen-szék pan | N46°47.542';<br>E19°10.647' | 18/06/2013 | 369            | 2.56                 | 104796                   | 213                | 100                  |
| Kelemen-szék pan | N46°47.542';<br>E19°10.647' | 24/07/2013 | 313            | 9.37                 | 165054                   | 299                | 100                  |
| Kelemen-szék pan | N46°47.542';<br>E19°10.647' | 15/08/2013 | 580            | 42.63                | 9274446                  | 5610               | 99                   |
| Kelemen-szék pan | N46°47.542';<br>E19°10.647' | 06/04/2001 | 2160           | 33.00                | 2111171                  | 5803               | 97                   |
| Kelemen-szék pan | N46°47.542';<br>E19°10.647' | 26/05/2001 | 933            | 8.92                 | 4071200                  | 5583               | 95                   |
| Kelemen-szék pan | N46°47.542';<br>E19°10.647' | 16/06/2001 | 734            | 10.10                | 2760000                  | 2760               | 94                   |
| Kelemen-szék pan | N46°47.542';<br>E19°10.647' | 19/07/2001 | 860            | 77.75                | 12711150                 | 6610               | 98                   |
| Kelemen-szék pan | N46°47.542';<br>E19°10.647' | 14/08/2001 | 701            | 58.75                | 13621180                 | 7083               | 80                   |
| Kelemen-szék pan | N46°47.542';<br>E19°10.647' | 16/10/2001 | 978            | 3.56                 | 256000                   | 451                | 81                   |
| Böddi-szék pan   | N46°46.061';<br>E19°8.726'  | 17/04/2013 | 257            | 4.26                 | 36679                    | 74                 | 100                  |
| Böddi-szék pan   | N46°46.061';<br>E19°8.726'  | 30/05/2013 | 532            | 22.37                | 345827                   | 702                | 100                  |
| Böddi-szék pan   | N46°46.061';<br>E19°8.726'  | 18/06/2013 | 400            | 23.00                | 377266                   | 765                | 100                  |
| Böddi-szék pan   | N46°46.061';<br>E19°8.726'  | 24/07/2013 | 226            | 5.11                 | 204352                   | 190                | 100                  |

## Supplementary material on measured parameters (Somogyi et al.)

| Lake           | Coordinates                 | Date       | TSS-Org (mg/L) | Chlorophyll a (ug/l) | APP abundance (cells/ml) | APP biomass (µg/l) | APP contribution (%) |
|----------------|-----------------------------|------------|----------------|----------------------|--------------------------|--------------------|----------------------|
| Böddi-szék pan | N46°46.061';<br>E19°8.726'  | 15/08/2013 | 1062           | 119.36               | 23087869                 | 13728              | 100                  |
| Böddi-szék pan | N46°46.061';<br>E19°8.726'  | 24/09/2013 | 589            | 163.91               | 299833                   | 595                | 45                   |
| Böddi-szék pan | N46°46.061';<br>E19°8.726'  | 19/11/2013 | 153            | 15.76                | 301289                   | 243                | 52                   |
| Böddi-szék pan | N46°46.061';<br>E19°8.726'  | 09/12/2013 | 825            | 26.40                | 340587                   | 419                | 89                   |
| Fehér-szék pan | N46°48.448';<br>E19°11.221' | 06/04/2001 | 776            | 69.60                | 6314000                  | 6374               | 100                  |
| Fehér-szék pan | N46°48.448';<br>E19°11.221' | 26/05/2001 | 557            | 12.65                | 5591600                  | 6303               | 97                   |
| Fehér-szék pan | N46°48.448';<br>E19°11.221' | 16/06/2001 | 381            | 2.56                 | 1545600                  | 1546               | 77                   |
| Fehér-szék pan | N46°48.448';<br>E19°11.221' | 19/07/2001 | 323            | 15.28                | 3065100                  | 1594               | 74                   |
| Fehér-szék pan | N46°48.448';<br>E19°11.221' | 14/08/2001 | 573            | 100.64               | 60374960                 | 31395              | 97                   |
| Fehér-szék pan | N46°48.448';<br>E19°11.221' | 16/10/2001 | 131            | 1.72                 | 200000                   | 352                | 79                   |
| Fehér-szék pan | N46°48.448';<br>E19°11.221' | 28/04/2013 | 30             | 2.13                 | 0                        | 0                  | 0                    |
| Fehér-szék pan | N46°48.448';<br>E19°11.221' | 30/05/2013 | 18             | 3.70                 | 0                        | 0                  | 0                    |
| Fehér-szék pan | N46°48.448';<br>E19°11.221' | 18/06/2013 | 9              | 2.56                 | 0                        | 0                  | 0                    |
| Fehér-szék pan | N46°48.448';<br>E19°11.221' | 24/07/2013 | 194            | 3.98                 | 0                        | 0                  | 0                    |
| Fehér-szék pan | N46°48.448';<br>E19°11.221' | 15/08/2013 | 860            | 13.65                | 0                        | 0                  | 0                    |

## Supplementary material on measured parameters (Somogyi et al.)

| Lake                | Coordinates                 | Date       | TSS-Org (mg/L) | Chlorophyll a (ug/l) | APP abundance (cells/ml) | APP biomass (µg/l) | APP contribution (%) |
|---------------------|-----------------------------|------------|----------------|----------------------|--------------------------|--------------------|----------------------|
| Fehér-szék pan      | N46°48.448';<br>E19°11.221' | 24/09/2013 | 2252           | 400.28               | 64624200                 | 47889              | 100                  |
| Fehér-szék pan      | N46°48.448';<br>E19°11.221' | 17/10/2013 | 1571           | 383.40               | 27875736                 | 45353              | 99                   |
| Fehér-szék pan      | N46°48.448';<br>E19°11.221' | 19/11/2013 | 1137           | 232.85               | 21273588                 | 16984              | 99                   |
| Fehér-szék pan      | N46°48.448';<br>E19°11.221' | 09/12/2013 | 747            | 136.30               | 22705800                 | 19653              | 100                  |
| Unterer Strinkersee | N47°47.762';<br>E16°47.160' | 14/10/2008 | 43             | 5.11                 | 1139878                  | 593                | 100                  |
| Unterer Strinkersee | N47°47.762';<br>E16°47.160' | 27/10/2008 | 414            | 13.62                | 946413                   | 492                | 36                   |
| Unterer Strinkersee | N47°47.762';<br>E16°47.160' | 10/11/2008 | 500            | 27.25                | 1285414                  | 680                | 25                   |
| Unterer Strinkersee | N47°47.762';<br>E16°47.160' | 24/11/2008 | 37             | 7.67                 | 992651                   | 516                | 67                   |
| Unterer Strinkersee | N47°47.762';<br>E16°47.160' | 09/12/2008 | 97             | 13.62                | 945784                   | 566                | 42                   |
| Unterer Strinkersee | N47°47.762';<br>E16°47.160' | 22/12/2008 | 168            | 10.65                | 717853                   | 390                | 37                   |
| Unterer Strinkersee | N47°47.762';<br>E16°47.160' | 12/01/2009 | 39             | 7.23                 | 1051235                  | 698                | 96                   |
| Unterer Strinkersee | N47°47.762';<br>E16°47.160' | 02/03/2009 | 23             | 5.11                 | 268976                   | 186                | 36                   |
| Unterer Strinkersee | N47°47.762';<br>E16°47.160' | 09/03/2009 | 836            |                      | 434903                   | 240                |                      |
| Unterer Strinkersee | N47°47.762';<br>E16°47.160' | 14/04/2009 | 18             | 0.85                 | 28819                    | 18                 | 21.58                |
| Unterer Strinkersee | N47°47.762';<br>E16°47.160' | 27/04/2009 | 28             | 2.89                 | 64624                    | 34                 | 11.63                |

## Supplementary material on measured parameters (Somogyi et al.)

| Lake                     | Coordinates                 | Date       | TSS-Org (mg/L) | Chlorophyll a (ug/l) | APP abundance (cells/ml) | APP biomass (µg/l) | APP contribution (%) |
|--------------------------|-----------------------------|------------|----------------|----------------------|--------------------------|--------------------|----------------------|
| Unterer Strinkersee      | N47°47.762';<br>E16°47.160' | 18/05/2009 | 9              | 1.38                 | 8733                     | 5                  | 3.29                 |
| Unterer Strinkersee      | N47°47.762';<br>E16°47.160' | 02/06/2009 | 16             | 2.13                 | 139728                   | 97                 | 45.77                |
| Unterer Strinkersee      | N47°47.762';<br>E16°47.160' | 16/06/2009 | 40             | 4.05                 | 168110                   | 107                | 26.41                |
| Unterer Strinkersee      | N47°47.762';<br>E16°47.160' | 29/06/2009 | 9              | 1.39                 | 11353                    | 6                  | 4.25                 |
| Unterer Strinkersee      | N47°47.762';<br>E16°47.160' | 14/07/2009 | 33             | 4.09                 | 36679                    | 24                 | 5.76                 |
| Unterer Strinkersee      | N47°47.762';<br>E16°47.160' | 28/07/2009 | 91             | 5.11                 | 218325                   | 114                | 22.22                |
| Unterer Strinkersee      | N47°47.762';<br>E16°47.160' | 12/08/2009 | 54             | 7.67                 | 967616                   | 503                | 65.60                |
| Unterer Strinkersee      | N47°47.762';<br>E16°47.160' | 24/08/2009 | 159            | 6.39                 | 449313                   | 234                | 36.56                |
| Unterer Strinkersee      | N47°47.762';<br>E16°47.160' | 07/09/2009 | 142            | 7.25                 | 150208                   | 78                 | 10.77                |
| Unterer Strinkersee      | N47°47.762';<br>E16°47.160' | 21/09/2009 | 126            | 6.53                 | 328361                   | 171                | 26.15                |
| Unterer Strinkersee      | N47°47.762';<br>E16°47.160' | 05/10/2009 | 120            | 5.96                 | 614585                   | 320                | 53.62                |
| Lake Fertő/Neusiedlersee | N47°46.228';<br>E16°43.298' | 22/09/2008 | 23             | 5.84                 | 261466                   | 137                | 23.63                |
| Lake Fertő/Neusiedlersee | N47°46.228';<br>E16°43.298' | 14/10/2008 | 12             | 3.51                 | 307453                   | 161                | 29.80                |
| Lake Fertő/Neusiedlersee | N47°46.228';<br>E16°43.298' | 27/10/2008 | 50             | 9.65                 | 240003                   | 126                | 12.67                |
| Lake Fertő/Neusiedlersee | N47°46.228';<br>E16°43.298' | 10/11/2008 | 31             | 16.61                | 699663                   | 367                | 20.54                |

## Supplementary material on measured parameters (Somogyi et al.)

| Lake                     | Coordinates                 | Date       | TSS-Org (mg/L) | Chlorophyll a (ug/l) | APP abundance (cells/ml) | APP biomass (µg/l) | APP contribution (%) |
|--------------------------|-----------------------------|------------|----------------|----------------------|--------------------------|--------------------|----------------------|
| Lake Fertő/Neusiedlersee | N47°46.228';<br>E16°43.298' | 24/11/2008 | 82             | 12.35                | 288771                   | 151                | 24.88                |
| Lake Fertő/Neusiedlersee | N47°46.228';<br>E16°43.298' | 09/12/2008 | 28             | 8.95                 | 1075469                  | 564                | 61.20                |
| Lake Fertő/Neusiedlersee | N47°46.228';<br>E16°43.298' | 22/12/2008 | 21             | 14.91                | 662835                   | 347                | 49.08                |
| Lake Fertő/Neusiedlersee | N47°46.228';<br>E16°43.298' | 12/01/2009 | 7              | 5.86                 | 768504                   | 403                | 57.88                |
| Lake Fertő/Neusiedlersee | N47°46.228';<br>E16°43.298' | 02/03/2009 | 13             | 8.74                 | 927445                   | 486                | 52.60                |
| Lake Fertő/Neusiedlersee | N47°46.228';<br>E16°43.298' | 09/03/2009 | 236            | 37.05                | 1467144                  | 769                | 63.46                |
| Lake Fertő/Neusiedlersee | N47°46.228';<br>E16°43.298' | 14/04/2009 | 62             | 14.9                 | 1108121                  | 581                | 28.16                |
| Lake Fertő/Neusiedlersee | N47°46.228';<br>E16°43.298' | 27/04/2009 | 140            | 19.17                | 1292484                  | 678                | 69.31                |
| Lake Fertő/Neusiedlersee | N47°46.228';<br>E16°43.298' | 18/05/2009 | 35             | 8.3                  | 234821                   | 123                | 15.45                |
| Lake Fertő/Neusiedlersee | N47°46.228';<br>E16°43.298' | 02/06/2009 | 34             | 8.51                 | 185334                   | 97                 | 4.92                 |
| Lake Fertő/Neusiedlersee | N47°46.228';<br>E16°43.298' | 16/06/2009 | 40             | 17.32                | 149431                   | 78                 | 5.19                 |
| Lake Fertő/Neusiedlersee | N47°46.228';<br>E16°43.298' | 29/06/2009 | 18             | 10.9                 | 327973                   | 172                | 8.89                 |
| Lake Fertő/Neusiedlersee | N47°46.228';<br>E16°43.298' | 14/07/2009 | 13             | 4.26                 | 361934                   | 190                | 14.31                |
| Lake Fertő/Neusiedlersee | N47°46.228';<br>E16°43.298' | 28/07/2009 | 95             | 18.31                | 338646                   | 178                |                      |
| Lake Fertő/Neusiedlersee | N47°46.228';<br>E16°43.298' | 12/08/2009 | 28             | 8.86                 | 311768                   | 163                | 8.20                 |

## Supplementary material on measured parameters (Somogyi et al.)

| Lake                       | Coordinates                 | Date       | TSS-Org (mg/L) | Chlorophyll a (ug/l) | APP abundance (cells/ml) | APP biomass (µg/l) | APP contribution (%) |
|----------------------------|-----------------------------|------------|----------------|----------------------|--------------------------|--------------------|----------------------|
| Lake Fertő/Neusiedlersee   | N47°46.228';<br>E16°43.298' | 24/08/2009 | 24             | 11.75                | 132243                   | 69                 | 4.61                 |
| Lake Fertő/Neusiedlersee   | N47°46.228';<br>E16°43.298' | 07/09/2009 | 28             | 16.69                | 117896                   | 62                 | 7.00                 |
| Lake Fertő/Neusiedlersee   | N47°46.228';<br>E16°43.298' | 21/09/2009 | 21             | 6.71                 | 92570                    | 49                 | 7.00                 |
| Lake Fertő/Neusiedlersee   | N47°46.228';<br>E16°43.298' | 05/10/2009 | 14             | 9.65                 | 289936                   | 152                | 7.00                 |
| Lake Balaton Eastern basin | N46°58.267';<br>E18°4.921'  | 16/01/2008 |                | 4.26                 | 212212                   | 293                | 40.28                |
| Lake Balaton Eastern basin | N46°58.267';<br>E18°4.921'  | 12/02/2008 | 13             | 3.31                 | 156539                   | 124                | 18.02                |
| Lake Balaton Eastern basin | N46°58.267';<br>E18°4.921'  | 08/04/2008 | 22             | 4.97                 | 400321                   | 224                | 23.18                |
| Lake Balaton Eastern basin | N46°58.267';<br>E18°4.921'  | 07/05/2008 | 11             | 3.3                  | 534169                   | 287                | 42.37                |
| Lake Balaton Eastern basin | N46°58.267';<br>E18°4.921'  | 03/06/2008 | 14             | 4.37                 | 391488                   | 212                | 29.74                |
| Lake Balaton Eastern basin | N46°58.267';<br>E18°4.921'  | 16/06/2008 | 13             | 6.18                 | 231599                   | 121                | 11.95                |
| Lake Balaton Eastern basin | N46°58.267';<br>E18°4.921'  | 01/07/2008 | 15             | 6.34                 | 270141                   | 142                | 19.29                |
| Lake Balaton Eastern basin | N46°58.267';<br>E18°4.921'  | 07/07/2008 | 18             | 6.53                 | 260942                   | 137                | 7.18                 |
| Lake Balaton Eastern basin | N46°58.267';<br>E18°4.921'  | 29/07/2008 | 6              | 3.69                 | 364166                   | 191                | 10.89                |
| Lake Balaton Eastern basin | N46°58.267';<br>E18°4.921'  | 11/08/2008 | 16             | 7.18                 | 202256                   | 106                | 3.15                 |
| Lake Balaton Eastern basin | N46°58.267';<br>E18°4.921'  | 26/08/2008 | 17             | 11.18                | 195445                   | 102                | 2.95                 |

## Supplementary material on measured parameters (Somogyi et al.)

| Lake                       | Coordinates                | Date       | TSS-Org (mg/L) | Chlorophyll a (ug/l) | APP abundance (cells/ml) | APP biomass (µg/l) | APP contribution (%) |
|----------------------------|----------------------------|------------|----------------|----------------------|--------------------------|--------------------|----------------------|
| Lake Balaton Eastern basin | N46°58.267';<br>E18°4.921' | 09/09/2008 | 11             | 9.26                 | 180249                   | 94                 | 4.42                 |
| Lake Balaton Eastern basin | N46°58.267';<br>E18°4.921' | 23/09/2008 | 12             | 7.56                 | 81508                    | 43                 | 1.90                 |
| Lake Balaton Eastern basin | N46°58.267';<br>E18°4.921' | 07/10/2008 | 14             | 6.28                 | 151372                   | 79                 | 5.03                 |
| Lake Balaton Eastern basin | N46°58.267';<br>E18°4.921' | 29/10/2008 | 10             | 7.98                 | 330606                   | 173                | 10.06                |
| Lake Balaton Eastern basin | N46°58.267';<br>E18°4.921' | 26/11/2008 | 10             | 3.69                 | 203188                   | 113                | 32.62                |
| Lake Balaton Eastern basin | N46°58.267';<br>E18°4.921' | 05/12/2008 |                | 5.67                 | 97227                    | 65                 | 15.00                |
| Lake Balaton Eastern basin | N46°58.267';<br>E18°4.921' | 26/01/2009 | 5              | 2.06                 | 74405                    | 120                | 67.99                |
| Lake Balaton Eastern basin | N46°58.267';<br>E18°4.921' | 18/02/2009 |                | 13.34                | 81217                    | 133                | 22.02                |
| Lake Balaton Eastern basin | N46°58.267';<br>E18°4.921' | 26/03/2009 | 11             | 5.39                 | 101652                   | 172                | 49.48                |
| Lake Balaton Eastern basin | N46°58.267';<br>E18°4.921' | 14/04/2009 | 5              | 4.16                 | 229241                   | 169                | 24.85                |
| Lake Balaton Eastern basin | N46°58.267';<br>E18°4.921' | 13/05/2009 | 18             | 3.41                 | 313639                   | 176                | 27.54                |
| Lake Balaton Eastern basin | N46°58.267';<br>E18°4.921' | 15/06/2009 | 8              | 3.24                 | 305218                   | 160                | 10.13                |
| Lake Balaton Eastern basin | N46°58.267';<br>E18°4.921' | 20/07/2009 | 16             | 6.13                 | 173961                   | 91                 | 5.46                 |
| Lake Balaton Eastern basin | N46°58.267';<br>E18°4.921' | 17/08/2009 | 4              | 2.05                 | 301289                   | 158                | 24.67                |
| Lake Balaton Eastern basin | N46°58.267';<br>E18°4.921' | 28/09/2009 | 6              | 7.04                 | 104796                   | 55                 | 2.65                 |

## Supplementary material on measured parameters (Somogyi et al.)

| Lake                       | Coordinates                 | Date       | TSS-Org (mg/L) | Chlorophyll a (ug/l) | APP abundance (cells/ml) | APP biomass (µg/l) | APP contribution (%) |
|----------------------------|-----------------------------|------------|----------------|----------------------|--------------------------|--------------------|----------------------|
| Lake Balaton Eastern basin | N46°58.267';<br>E18°4.921'  | 12/10/2009 | 12             | 5.88                 | 323121                   | 169                | 12.56                |
| Lake Balaton Eastern basin | N46°58.267';<br>E18°4.921'  | 10/11/2009 | 5              | 8.11                 | 58162                    | 30                 | 4.60                 |
| Lake Balaton Eastern basin | N46°58.267';<br>E18°4.921'  | 07/12/2009 | 7              | 4.68                 | 105844                   | 56                 | 4.71                 |
| Lake Balaton Western basin | N46°43.652';<br>E17°16.520' | 16/01/2008 |                | 3.66                 | 175009                   | 78                 | 22.35                |
| Lake Balaton Western basin | N46°43.652';<br>E17°16.520' | 12/02/2008 | 4              | 9.37                 | 276836                   | 243                | 38.69                |
| Lake Balaton Western basin | N46°43.652';<br>E17°16.520' | 10/03/2008 | 7              | 9.48                 | 618296                   | 220                | 23.88                |
| Lake Balaton Western basin | N46°43.652';<br>E17°16.520' | 08/04/2008 | 44             | 8.74                 | 330107                   | 345                | 59.53                |
| Lake Balaton Western basin | N46°43.652';<br>E17°16.520' | 07/05/2008 | 21             | 5.45                 | 323820                   | 177                | 30.00                |
| Lake Balaton Western basin | N46°43.652';<br>E17°16.520' | 03/06/2008 | 27             | 7.16                 | 350019                   | 174                | 16.31                |
| Lake Balaton Western basin | N46°43.652';<br>E17°16.520' | 16/06/2008 | 23             | 8.69                 | 233171                   | 184                | 11.09                |
| Lake Balaton Western basin | N46°43.652';<br>E17°16.520' | 01/07/2008 | 17             | 16.5                 | 337443                   | 122                | 3.58                 |
| Lake Balaton Western basin | N46°43.652';<br>E17°16.520' | 07/07/2008 | 18             | 28.54                | 313340                   | 177                | 3.01                 |
| Lake Balaton Western basin | N46°43.652';<br>E17°16.520' | 29/07/2008 | 10             | 15.16                | 249414                   | 164                | 3.33                 |
| Lake Balaton Western basin | N46°43.652';<br>E17°16.520' | 11/08/2008 | 49             | 32.72                | 211688                   | 131                | 1.72                 |
| Lake Balaton Western basin | N46°43.652';<br>E17°16.520' | 26/08/2008 | 14             | 32.38                | 163482                   | 111                | 1.30                 |

## Supplementary material on measured parameters (Somogyi et al.)

| Lake                       | Coordinates                 | Date       | TSS-Org (mg/L) | Chlorophyll a (ug/l) | APP abundance (cells/ml) | APP biomass (µg/l) | APP contribution (%) |
|----------------------------|-----------------------------|------------|----------------|----------------------|--------------------------|--------------------|----------------------|
| Lake Balaton Western basin | N46°43.652';<br>E17°16.520' | 09/09/2008 | 18             | 37.15                | 175242                   | 86                 | 0.90                 |
| Lake Balaton Western basin | N46°43.652';<br>E17°16.520' | 23/09/2008 | 12             | 26.08                | 68641                    | 92                 | 1.51                 |
| Lake Balaton Western basin | N46°43.652';<br>E17°16.520' | 07/10/2008 | 12             | 8.15                 | 445383                   | 41                 | 5.52                 |
| Lake Balaton Western basin | N46°43.652';<br>E17°16.520' | 29/10/2008 | 31             | 10.9                 | 0                        | 233                | 37.06                |
| Lake Balaton Western basin | N46°43.652';<br>E17°16.520' | 26/11/2008 | 8              | 11.82                | 179027                   | 0                  | 0.00                 |
| Lake Balaton Western basin | N46°43.652';<br>E17°16.520' | 15/12/2008 | 44             | 19.3                 | 15719                    | 179                | 22.93                |
| Lake Balaton Western basin | N46°43.652';<br>E17°16.520' | 26/01/2009 | 5              | 2.31                 | 291100                   | 26                 | 13.88                |
| Lake Balaton Western basin | N46°43.652';<br>E17°16.520' | 19/02/2009 |                |                      | 281203                   | 523                | 49.72                |
| Lake Balaton Western basin | N46°43.652';<br>E17°16.520' | 26/03/2009 | 6              | 9.58                 | 837320                   | 394                | 51.76                |
| Lake Balaton Western basin | N46°43.652';<br>E17°16.520' | 14/04/2009 | 17             | 12.35                | 318318                   | 515                | 49.01                |
| Lake Balaton Western basin | N46°43.652';<br>E17°16.520' | 13/05/2009 | 32             | 8.23                 | 363511                   | 185                | 18.00                |
| Lake Balaton Western basin | N46°43.652';<br>E17°16.520' | 15/06/2009 | 4              | 3.11                 | 260826                   | 191                | 21.48                |
| Lake Balaton Western basin | N46°43.652';<br>E17°16.520' | 20/07/2009 | 12             | 12.01                | 250200                   | 131                | 3.26                 |
| Lake Balaton Western basin | N46°43.652';<br>E17°16.520' | 10/08/2009 |                | 21.78                | 158358                   | 252                | 4.59                 |
| Lake Balaton Western basin | N46°43.652';<br>E17°16.520' | 31/08/2009 | 21             | 27.44                | 445383                   | 83                 | 1.68                 |

## Supplementary material on measured parameters (Somogyi et al.)

| Lake                       | Coordinates                 | Date       | TSS-Org (mg/L) | Chlorophyll a (ug/l) | APP abundance (cells/ml) | APP biomass (µg/l) | APP contribution (%) |
|----------------------------|-----------------------------|------------|----------------|----------------------|--------------------------|--------------------|----------------------|
| Lake Balaton Western basin | N46°43.652';<br>E17°16.520' | 28/09/2009 | 21             | 20.62                | 379886                   | 233                | 4.00                 |
| Lake Balaton Western basin | N46°43.652';<br>E17°16.520' | 12/10/2009 | 17             | 9.59                 | 55018                    | 199                | 10.50                |
| Lake Balaton Western basin | N46°43.652';<br>E17°16.520' | 10/11/2009 |                | 8.09                 | 71552                    | 29                 | 2.57                 |

Supplementary material on measured parameters (Somogyi et al.)
